# Supplementary material for: Systematic genomic and translational efficiency studies of uveal melanoma
Source: PLoS One. 2017 Jun 8;12(6):e0178189. doi: 10.1371/journal.pone.0178189 (PMC5464544; doi:10.1371/journal.pone.0178189)
Supplement: S6 Table — P-value and cluster is indicated for each gene. (XLS) [file pone.0178189.s007.xls]

## Sheet: Sheet 1
Gene	logFC	logCPM	LR	PValue	Rank	FDR	Cluster
PDF	-0.795671	3.29869	12.0913	0.000506573	1	1	1
GFER	-1.05851	2.35271	10.3434	0.00129942	2	1	1
RGS10	-0.501812	4.50279	9.54187	0.00200837	3	1	2
C20orf24	-1.09955	4.8893	8.79481	0.00302088	4	1	1
PGP	-0.755045	5.25578	8.67075	0.00323357	5	1	1
GET4	-0.773088	1.98155	8.21056	0.00416474	6	1	1
NKX2-4	-0.535408	2.30903	8.06765	0.00450626	7	1	3
SAC3D1	-0.740671	3.46726	8.05411	0.00454006	8	1	1
RP11-154J22.1	-0.978124	2.16875	7.99637	0.00468712	9	1	3
RPL36AL	-0.446449	8.26563	7.99607	0.00468791	10	1	1
TMEM160	-1.09706	5.54938	7.97837	0.00473396	11	1	2
ZC3HAV1L	-0.845483	2.4102	7.73878	0.00540474	12	1	3
RPL26	-0.515203	9.47511	7.37447	0.00661561	13	1	2
C19orf24	-0.795376	3.83412	7.30215	0.0068872	14	1	1
SNRPF	-0.485281	6.29383	7.10792	0.00767442	15	1	1
RP11-641D5.1	-0.449188	7.51896	7.09406	0.00773398	16	1	2
RPL35A	-0.505592	9.79498	6.80748	0.0090777	17	1	2
RP11-592N21.1	-0.483013	6.29547	6.6268	0.0100456	18	1	2
RPL22	-0.374419	8.57856	6.46445	0.0110054	19	1	2
CHCHD10	-0.587714	6.5126	6.44902	0.0111014	20	1	3
PRELID1	-0.555738	7.33715	6.39541	0.0114415	21	1	1
AC007036.5	-0.500436	1.34235	6.20065	0.0127703	22	1	3
AC022431.1	-0.49693	6.1143	6.10338	0.0134924	23	1	2
RP1-241P17.4	-0.333341	4.99344	6.06561	0.0137839	24	1	1
UQCRFS1P1	-0.535661	4.66902	6.00659	0.0142525	25	1	2
PCF11	0.405166	3.66083	5.99827	0.0143199	26	1	4
SERPINA1	-0.569213	1.67385	5.98185	0.0144538	27	1	3
RP4-706A16.3	-0.441321	7.80853	5.83951	0.0156702	28	1	2
RPL30	-0.528515	10.8579	5.75552	0.016437	29	1	2
AC005000.1	-0.3398	4.38137	5.74174	0.0165664	30	1	1
FAM176B	-0.764653	2.96852	5.58945	0.018069	31	1	1
MRPL51	-0.391831	7.19842	5.42942	0.0198003	32	1	1
H1FX-AS1	-0.492071	3.86813	5.39465	0.0201986	33	1	1
RP11-587D21.1	-0.486785	5.8096	5.31946	0.0210885	34	1	2
RP11-734J24.1	-0.511109	2.00122	5.30438	0.0212718	35	1	2
PDXP	-0.560112	2.51843	5.29816	0.021348	36	1	3
RP11-51O6.1	-0.485826	6.33358	5.27457	0.0216392	37	1	2
RPS27A	-0.462995	10.8936	5.26465	0.0217628	38	1	2
MRPS15	-0.385611	7.20853	5.25971	0.0218247	39	1	1
MRPS36	-0.356385	5.13356	5.24923	0.0219565	40	1	1
RPL34	-0.470203	9.43307	5.23907	0.0220851	41	1	2
RPS25	-0.456865	8.33419	5.23323	0.0221594	42	1	2
RPL17	-0.452721	9.12987	5.23209	0.0221739	43	1	3
RP11-359H18.1	-0.68595	2.6257	5.23126	0.0221845	44	1	2
TLCD1	-0.489425	4.49764	5.23061	0.0221927	45	1	1
UBA52	-0.476784	10.7637	5.1273	0.0235523	46	1	2
FAM173A	-0.647814	4.71456	5.11691	0.0236938	47	1	1
TMEM126A	-0.429357	5.04215	5.08538	0.0241283	48	1	1
CTD-2287O16.1	-0.453564	7.06487	5.06189	0.0244575	49	1	2
RPL31	-0.397752	10.1159	5.05063	0.024617	50	1	2
C11orf73	-0.432835	5.67181	5.02841	0.0249348	51	1	1
SNRPE	-0.391806	6.92945	4.98316	0.0255952	52	1	1
RP11-572P18.1	-0.437663	7.99257	4.96045	0.0259334	53	1	2
AC093106.7	-0.458418	5.51467	4.94913	0.0261039	54	1	2
GTF2IRD2B	-0.408188	2.11225	4.93839	0.0262665	55	1	3
RP11-526L22.1	-0.354578	5.40586	4.88963	0.0270184	56	1	3
RPS15	-0.467362	10.3961	4.86412	0.0274208	57	1	2
XKR6	-0.51759	2.3684	4.8361	0.0278699	58	1	NA
KBTBD3	-0.462718	1.27769	4.81678	0.028184	59	1	3
COX6C	-0.333462	8.74196	4.80037	0.0284537	60	1	1
RP11-430L17.1	-0.480734	1.72792	4.7901	0.0286237	61	1	2
RPL23	-0.424433	10.3944	4.76126	0.0291073	62	1	2
SNRPD2	-0.439099	8.59508	4.75187	0.0292664	63	1	1
RPS7	-0.412739	10.2217	4.74699	0.0293497	64	1	2
RPS15A	-0.470484	8.99484	4.74638	0.0293599	65	1	2
ZNF280D	-0.365742	4.04501	4.7403	0.0294639	66	1	1
C12orf45	-0.413274	4.42218	4.72938	0.0296516	67	1	3
RP11-50D9.1	-0.435919	6.17031	4.71423	0.029914	68	1	2
ZNF526	0.319219	3.87043	4.68557	0.030417	69	1	4
RPL29	-0.465301	9.87434	4.67342	0.0306328	70	1	2
RPL38	-0.476239	9.69846	4.66476	0.0307877	71	1	2
CTD-2292P10.2	-0.608468	2.66673	4.6647	0.0307887	72	1	3
RPL21P119	-0.43071	6.69138	4.65479	0.030967	73	1	2
RPLP2	-0.493784	10.1657	4.64115	0.0312142	74	1	2
ATP5G2	-0.401374	9.23665	4.58527	0.0322479	75	1	1
RPL21	-0.413197	5.70098	4.56865	0.0325623	76	1	2
AC011816.4	-0.479718	6.17717	4.55885	0.032749	77	1	2
RPL35	-0.470874	9.49856	4.5331	0.0332454	78	1	2
RP11-463M16.4	-0.31705	2.76561	4.52965	0.0333124	79	1	1
SEC61B	-0.354156	6.97999	4.52894	0.0333262	80	1	1
ABCA11P	-0.380616	2.85585	4.48753	0.034143	81	1	1
UQCRB	-0.32612	8.44924	4.4674	0.0345475	82	1	3
RP11-11N9.4	-0.400074	5.23585	4.42578	0.0353999	83	1	1
RPAIN	-0.32101	4.32462	4.42547	0.0354064	84	1	1
DYNLL1	-0.389455	8.61013	4.40667	0.0357987	85	1	1
RP11-20O24.4	-0.410589	7.08735	4.40337	0.0358681	86	1	3
RP11-466H18.1	-0.39628	9.09217	4.35611	0.0368765	87	1	2
RPS19	-0.513017	11.2091	4.33877	0.0372537	88	1	2
TMF1	0.556242	2.99827	4.31808	0.0377095	89	1	4
C4orf48	-0.788161	6.37888	4.31649	0.0377446	90	1	1
SAA2	-0.502026	1.2942	4.29812	0.0381546	91	1	3
HINT1	-0.448809	9.02307	4.29767	0.0381646	92	1	1
CTU1	-0.530384	3.44708	4.29496	0.0382254	93	1	1
ANKRD9	-0.497699	5.52075	4.29283	0.0382734	94	1	1
RP11-203F10.6	-0.446957	3.4974	4.28588	0.0384301	95	1	2
RPL5	-0.353519	9.70214	4.28439	0.0384639	96	1	3
RPL36	-0.486174	9.71539	4.26996	0.0387917	97	1	2
RP11-15B17.1	-0.413293	6.68792	4.25687	0.0390919	98	1	3
MRPS33	-0.329443	6.1318	4.2547	0.039142	99	1	2
ENDOG	-0.564518	3.40002	4.25262	0.0391898	100	1	1
NDUFB3	-0.368443	6.21644	4.24654	0.0393303	101	1	1
MAT2A	0.358542	6.53081	4.24392	0.0393911	102	1	4
RP11-822E23.1	-0.450314	2.07227	4.23588	0.0395782	103	1	2
RPS28	-0.524329	6.30864	4.22923	0.0397334	104	1	2
RP11-56D16.2	-0.508459	1.39911	4.22093	0.0399284	105	1	1
DBP	-0.388924	3.80889	4.21874	0.0399798	106	1	1
AC079250.1	-0.491926	6.58849	4.21467	0.0400759	107	1	2
RP11-509E16.1	0.501051	2.51065	4.20273	0.0403591	108	1	4
RP4-765A10.1	-0.355372	6.26464	4.19874	0.0404541	109	1	3
H3F3BP1	-0.380054	3.39044	4.18823	0.0407057	110	1	3
RPL28	-0.471984	10.9209	4.18767	0.040719	111	1	2
RPS7P1	-0.385719	8.57889	4.17644	0.0409898	112	1	2
ANKRD39	-0.378308	3.98314	4.13076	0.0421105	113	1	1
RPL14	-0.41202	10.0174	4.11519	0.0424997	114	1	2
RDH14	-0.494314	1.76532	4.1015	0.0428451	115	1	4
RPS7P11	-0.381574	7.10058	4.0695	0.0436641	116	1	2
CHCHD2P6	-0.444657	2.73537	4.06831	0.0436951	117	1	1
GNG11	-0.451477	6.47478	4.06415	0.0438027	118	1	1
RP11-565J7.3	-0.387326	5.76993	4.0482	0.0442184	119	1	2
CHD1	0.47597	3.92259	4.04165	0.0443905	120	1	4
C8orf59	-0.397819	4.54834	4.03822	0.0444807	121	1	1
RPS16	-0.44689	10.6419	4.03328	0.0446111	122	1	2
LIG4	0.515136	1.90091	4.00832	0.0452761	123	1	4
RPS24	-0.395464	10.3107	4.00688	0.0453149	124	1	2
TMEM18	-0.389501	5.76519	3.99302	0.045689	125	1	2
PIGH	-0.355677	4.95649	3.99279	0.0456953	126	1	3
TMEM50A	-0.302926	5.3539	3.97882	0.0460759	127	1	3
MIF4GD	-0.361179	3.72618	3.97658	0.0461372	128	1	1
ATP5L	-0.370943	7.68521	3.96727	0.046393	129	1	1
HOXD3	-0.498762	2.55849	3.94923	0.0468927	130	1	1
AC007969.5	-0.438391	7.11341	3.94859	0.0469107	131	1	2
RPL13	-0.428595	10.9981	3.9409	0.0471255	132	1	2
TBCA	-0.331823	7.49745	3.93923	0.0471724	133	1	3
RP11-16F15.2	-0.406014	5.42746	3.92796	0.0474895	134	1	2
RANBP1	-0.309049	8.16514	3.92586	0.0475488	135	1	1
PRAF2	-0.454845	2.93826	3.92543	0.0475609	136	1	1
RP1-292B18.1	-0.493304	1.27664	3.91045	0.0479868	137	1	2
H3F3AP6	-0.30219	5.27613	3.88155	0.0488195	138	1	3
H3F3AP4	-0.255052	8.50297	3.86957	0.0491692	139	1	3
RP11-215A21.2	-0.413156	3.01993	3.8684	0.0492034	140	1	3
CLN5	-0.343426	3.36441	3.86759	0.049227	141	1	4
RPL32	-0.425243	10.4675	3.85733	0.0495291	142	1	2
